# Supplementary material for: Improved renal ischemia tolerance in females influences kidney transplantation outcomes
Source: JCI journal article supplement (doi:10.1172/jci84712), 2016-04-17
Supplement: sd1 [file 1]

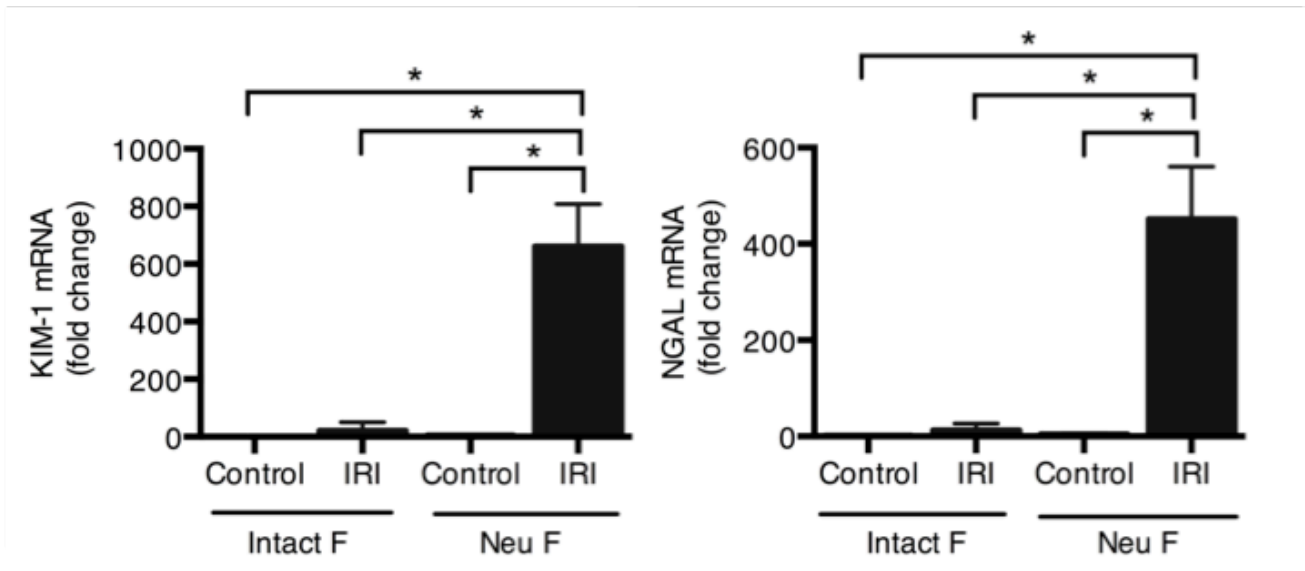

**Supplemental Figure 1.** Renal Injury Markers in Neutered Mice. Quantitative PCR demonstrated elevated renal injury markers in neutered females compared to intact females at 7 days post-IRI (n=3 animals per group run in triplicate, \*p<0.0001, 1-way ANOVA). Error bars indicate mean ± SEM.

**Supplemental Table 1**

Characteristics of 46,691 deceased donor kidney transplants between 2009-2014

| <b>Characteristic</b> | <b>No DGF</b>  | <b>DGF</b>     |
|-----------------------|----------------|----------------|
| n                     | 34110 (73.1%)  | 12,581 (26.9%) |
| Donor Gender          |                |                |
| Male                  | 20,566 (72.3%) | 7,888 (27.7%)  |
| Female                | 13,544 (74.3%) | 4,693 (25.7%)  |
| Recipient Gender      |                |                |
| Male                  | 20,548 (70.8%) | 8,495 (29.2%)  |
| Female                | 13,562 (76.8%) | 4,086 (23.2%)  |
| Recipient Age         |                |                |
| 18-40                 | 6,961 (77.5%)  | 2,019 (22.5%)  |
| 41-55                 | 11,935 (73.3%) | 4,347 (26.7%)  |
| 56-70                 | 13,112 (71.2%) | 5,312 (28.8%)  |
| 71+                   | 2,102 (70.0%)  | 903 (30.0%)    |
| Donor Race            |                |                |
| Not Black             | 29,159 (72.9%) | 10835 (27.1%)  |
| Black                 | 4,951 (73.9%)  | 1,746 (26.1%)  |
| Recipient Race        |                |                |
| White                 | 15,568 (76.9%) | 4,671 (23.1%)  |
| Black                 | 10,600 (68.6%) | 4,852 (31.4%)  |
| Hispanic              | 5,241 (80.0%)  | 2,039 (28.0%)  |
| Asian                 | 2,067 (73.0%)  | 766 (27.0%)    |
| Other                 | 634 (71.5%)    | 253 (28.5%)    |
| ECD                   |                |                |
| No                    | 29,135 (74.2%) | 10,137 (25.8%) |
| Yes                   | 4,975 (67.1%)  | 2,444 (32.9%)  |
| DCD                   |                |                |
| No                    | 30,187 (76.0%) | 9,551 (24.0%)  |
| Yes                   | 3,869 (56.8%)  | 2,946 (43.2%)  |
| Cause of ESRD         |                |                |
| GN                    | 6,349 (75.8%)  | 2,026 (24.2%)  |
| HTN                   | 8,239 (71.5%)  | 3,278 (28.5%)  |
| Other                 | 19,522 (72.9%) | 7,277 (27.1%)  |
| Recipient Diabetes    |                |                |
| No                    | 20,001 (74.2%) | 6,973 (25.8%)  |
| Yes                   | 14,109 (71.6%) | 5,608 (28.4%)  |
| PRA %                 |                |                |
| 0                     | 20,989 (72.1%) | 8,126 (27.9%)  |
| 1-20                  | 2,441 (72.1%)  | 946 (27.9%)    |
| 21-79                 | 5,416 (75.5%)  | 1758 (24.5%)   |
| 80-100                | 5,264 (75.0%)  | 1,751 (25.0%)  |
| Cold Ischemia Time    |                |                |
| < 8h                  | 4,818 (82.3%)  | 1,035 (17.7%)  |
| 8-16h                 | 15,260 (75.8%) | 4,882 (24.2%)  |
| 17-24h                | 8,650 (68.7%)  | 3,937 (31.3%)  |

|         |               |               |
|---------|---------------|---------------|
| 25-48h  | 4,352 (64.4%) | 2,406 (35.6%) |
| 49h+    | 250 (81.7%)   | 56 (18.3%)    |
| Missing | 800 (75.1%)   | 265 (24.9%)   |
